# Supplementary material for: The Molecular Epidemiology and Evolutionary Dynamics of Influenza B Virus in Two Italian Regions during 2010–2015: The Experience of Sicily and Liguria
Source: PubMed Central journal article supplement (PMC4849005; doi:10.3390/ijms17040549), 2016-04-13
Supplement: ijms-17-00549-s001.pdf [file ijms-17-00549-s001.pdf]

# Supplementary Materials: The Molecular Epidemiology and Evolutionary Dynamics of Influenza B Virus in Two Italian Regions during 2010–2015: The Experience of Sicily and Liguria

Fabio Tramuto, Andrea Orsi, Carmelo Massimo Maida, Claudio Costantino, Cecilia Trucchi, Cristiano Alicino, Francesco Vitale and Filippo Ansaldi

**Table S1.** Relevant details of Influenza B strains identified in Sicily and Liguria between 2010 and 2015.

| GENBANK<br>ACCESSION<br>NUMBER | VIRUS NAME        | B LINEAGE     | B CLADE        | COLLECTION<br>DATE | AGE      | SEX    | SOURCE    |
|--------------------------------|-------------------|---------------|----------------|--------------------|----------|--------|-----------|
| Pending                        | B/Genoa/01/2009   | Victoria-like | 1A             | NA                 | NA       | NA     | NA        |
| Pending                        | B/Genoa/03/2009   | Victoria-like | 1A             | NA                 | NA       | NA     | NA        |
| Pending                        | B/Genoa/04/2010   | Victoria-like | 1A             | 20/12/2010         | 1 year   | Male   | Hospital  |
| Pending                        | B/Genoa/02/2011   | Victoria-like | 1A             | 03/01/2011         | 11 years | Female | Hospital  |
| Pending                        | B/Genoa/22/2011   | Victoria-like | 1A             | 18/01/2011         | 49 years | Male   | Hospital  |
| KU529067                       | B/Palermo/3/2013  | Victoria-like | 1A             | 21/01/2013         | 2 years  | Female | Community |
| KU529065                       | B/Palermo/16/2013 | Victoria-like | 1A             | 31/01/2013         | 7 years  | Male   | Community |
| KU529066                       | B/Palermo/17/2013 | Victoria-like | 1A             | 31/01/2013         | 12 years | Female | Community |
| KU529085                       | B/Palermo/27/2013 | Victoria-like | 1A             | 05/02/2013         | 16 years | Female | Community |
| Pending                        | B/Genoa/02/2010   | Victoria-like | 1B             | 01/12/2010         | 5 years  | Male   | Hospital  |
| Pending                        | B/Genoa/08/2010   | Victoria-like | 1B             | 30/12/2010         | 72 years | Male   | Hospital  |
| Pending                        | B/Genoa/12/2011   | Victoria-like | 1B             | 13/01/2011         | 65 years | Male   | Hospital  |
| KU529076                       | B/Palermo/1/2011  | Victoria-like | 1B             | 13/01/2011         | 42 years | Female | Community |
| KU529074                       | B/Palermo/5/2011  | Victoria-like | 1B             | 20/01/2011         | 19 years | Female | Community |
| KU529079                       | B/Palermo/6/2011  | Victoria-like | 1B             | 20/01/2011         | 16 years | Male   | Community |
| KU529071                       | B/Palermo/7/2011  | Victoria-like | 1B             | 24/01/2011         | 15 years | Male   | Community |
| KU529084                       | B/Palermo/9/2011  | Victoria-like | 1B             | 24/01/2011         | 16 years | Female | Community |
| KU529077                       | B/Palermo/10/2011 | Victoria-like | 1B             | 27/01/2011         | 47 years | Male   | Community |
| KU529069                       | B/Enna/1/2011     | Victoria-like | 1B             | 29/01/2011         | 75 years | Male   | Hospital  |
| KU529070                       | B/Enna/3/2011     | Victoria-like | 1B             | 29/01/2011         | 31 years | Male   | Hospital  |
| KU529080                       | B/Palermo/11/2011 | Victoria-like | 1B             | 31/01/2011         | 50 years | Female | Community |
| KU529081                       | B/Palermo/12/2011 | Victoria-like | 1B             | 02/02/2011         | 20 years | Female | Hospital  |
| KU529075                       | B/Palermo/13/2011 | Victoria-like | 1B             | 09/02/2011         | 11 years | Female | Hospital  |
| KU529068                       | B/Messina/2/2011  | Victoria-like | 1B             | 11/02/2011         | 59 years | Female | Hospital  |
| KU529078                       | B/Palermo/15/2011 | Victoria-like | 1B             | 12/02/2011         | 68 years | Male   | Community |
| KU529083                       | B/Palermo/4/2011  | Victoria-like | Non determined | 20/01/2011         | 5 years  | Male   | Community |
| KU529073                       | B/Palermo/8/2011  | Victoria-like | Non determined | 24/01/2011         | 33 years | Female | Community |
| KU529082                       | B/Enna/2/2011     | Victoria-like | Non determined | 29/01/2011         | 63 years | Female | Hospital  |
| Pending                        | B/Genoa/19/2015   | Victoria-like | Non determined | 23/05/2015         | 83 years | Female | Hospital  |
| KU528915                       | B/Palermo/1/2012  | Yamagata-like | 2              | 31/12/2012         | 15 years | Male   | Community |
| Pending                        | B/Genoa/0113/1213 | Yamagata-like | 2              | 07/01/2013         | 45 years | Male   | Hospital  |
| Pending                        | B/Genoa/2413/2013 | Yamagata-like | 2              | 07/01/2013         | NA       | NA     | Hospital  |
| KU528916                       | B/Palermo/1/2013  | Yamagata-like | 2              | 07/01/2013         | 7 years  | Female | Community |
| Pending                        | B/Genoa/0413/1213 | Yamagata-like | 2              | 15/01/2013         | 68 years | Female | Hospital  |
| Pending                        | B/Genoa/2313/2013 | Yamagata-like | 2              | 18/01/2013         | NA       | NA     | Hospital  |
| Pending                        | B/Genoa/2813/2013 | Yamagata-like | 2              | 18/01/2013         | NA       | NA     | Hospital  |
| Pending                        | B/Genoa/2513/2013 | Yamagata-like | 2              | 23/01/2013         | NA       | NA     | Hospital  |
| Pending                        | B/Genoa/2613/2013 | Yamagata-like | 2              | 23/01/2013         | NA       | NA     | Hospital  |
| Pending                        | B/Genoa/2713/2013 | Yamagata-like | 2              | 23/01/2013         | NA       | NA     | Hospital  |
| KU528918                       | B/Palermo/4/2013  | Yamagata-like | 2              | 24/01/2013         | 5 years  | Female | Community |
| KU528919                       | B/Palermo/5/2013  | Yamagata-like | 2              | 24/01/2013         | 7 years  | Male   | Community |
| KU528920                       | B/Palermo/6/2013  | Yamagata-like | 2              | 25/01/2013         | 63 years | Male   | Community |
| Pending                        | B/Genoa/31/2013   | Yamagata-like | 2              | 28/01/2013         | NA       | NA     | Hospital  |
| KU528922                       | B/Palermo/8/2013  | Yamagata-like | 2              | 28/01/2013         | 7 years  | Female | Community |
| KU528923                       | B/Palermo/10/2013 | Yamagata-like | 2              | 28/01/2013         | 6 years  | Male   | Community |
| Pending                        | B/Genoa/0713/1213 | Yamagata-like | 2              | 29/01/2013         | 55 years | Male   | Hospital  |
| Pending                        | B/Genoa/3213/2013 | Yamagata-like | 2              | 29/01/2013         | NA       | NA     | Hospital  |
| Pending                        | B/Genoa/3313/2013 | Yamagata-like | 2              | 29/01/2013         | NA       | NA     | Hospital  |

Table S1. Cont.

| GENBANK<br>ACCESSION<br>NUMBER | VIRUS NAME          | B LINEAGE     | B CLADE | COLLECTION<br>DATE | AGE       | SEX    | SOURCE    |
|--------------------------------|---------------------|---------------|---------|--------------------|-----------|--------|-----------|
| KU528926                       | B/Palermo/13/2013   | Yamagata-like | 2       | 29/01/2013         | 7 years   | Female | Community |
| KU528927                       | B/Palermo/14/2013   | Yamagata-like | 2       | 29/01/2013         | 5 years   | Male   | Community |
| KU528924                       | B/Palermo/11/2013   | Yamagata-like | 2       | 29/01/2013         | 9 years   | Female | Community |
| KU528925                       | B/Palermo/12/2013   | Yamagata-like | 2       | 29/01/2013         | 6 years   | Male   | Community |
| KU528928                       | B/Palermo/18/2013   | Yamagata-like | 2       | 31/01/2013         | 8 years   | Male   | Community |
| KU528929                       | B/Palermo/19/2013   | Yamagata-like | 2       | 31/01/2013         | 8 years   | Female | Community |
| KU528930                       | B/Palermo/20/2013   | Yamagata-like | 2       | 01/02/2013         | 5 years   | Female | Community |
| Pending                        | B/Genoa/3413/2013   | Yamagata-like | 2       | 02/02/2013         | NA        | NA     | Hospital  |
| Pending                        | B/Genoa/3513/2013   | Yamagata-like | 2       | 02/02/2013         | NA        | NA     | Hospital  |
| KU528931                       | B/Palermo/21/2013   | Yamagata-like | 2       | 04/02/2013         | 10 years  | Female | Community |
| KU528932                       | B/Palermo/22/2013   | Yamagata-like | 2       | 04/02/2013         | 3 years   | Male   | Community |
| KU528933                       | B/Palermo/23/2013   | Yamagata-like | 2       | 04/02/2013         | 7 years   | Female | Community |
| KU528934                       | B/Palermo/24/2013   | Yamagata-like | 2       | 04/02/2013         | 10 years  | Female | Community |
| KU528936                       | B/Palermo/25/2013   | Yamagata-like | 2       | 04/02/2013         | 5 years   | Female | Community |
| KU528935                       | B/Palermo/26/2013   | Yamagata-like | 2       | 05/02/2013         | 9 years   | Male   | Community |
| KU528937                       | B/Palermo/28/2013   | Yamagata-like | 2       | 05/02/2013         | 56 years  | Female | Community |
| KU528938                       | B/Palermo/29/2013   | Yamagata-like | 2       | 05/02/2013         | 36 years  | Female | Community |
| KU528939                       | B/Palermo/30/2013   | Yamagata-like | 2       | 05/02/2013         | 4 years   | Male   | Community |
| KU528940                       | B/Palermo/31/2013   | Yamagata-like | 2       | 05/02/2013         | 10 years  | Female | Community |
| KU528941                       | B/Palermo/32/2013   | Yamagata-like | 2       | 05/02/2013         | 2 years   | Male   | Community |
| KU528942                       | B/Palermo/33/2013   | Yamagata-like | 2       | 06/02/2013         | 2 years   | Female | Community |
| KU528944                       | B/Palermo/35/2013   | Yamagata-like | 2       | 06/02/2013         | 7 years   | Male   | Community |
| Pending                        | B/Genoa/4113/2013   | Yamagata-like | 2       | 07/02/2013         | NA        | NA     | Hospital  |
| KU528945                       | B/Palermo/36/2013   | Yamagata-like | 2       | 07/02/2013         | 6 years   | Female | Community |
| KU528946                       | B/Palermo/37/2013   | Yamagata-like | 2       | 07/02/2013         | 4 years   | Male   | Community |
| KU528947                       | B/Palermo/38/2013   | Yamagata-like | 2       | 07/02/2013         | 5 years   | Male   | Community |
| KU528948                       | B/Palermo/40/2013   | Yamagata-like | 2       | 07/02/2013         | 7 years   | Female | Community |
| KU528949                       | B/Palermo/41/2013   | Yamagata-like | 2       | 08/02/2013         | 6 years   | Female | Community |
| KU528951                       | B/Palermo/43/2013   | Yamagata-like | 2       | 08/02/2013         | 55 years  | Male   | Hospital  |
| Pending                        | B/Genoa/3613/2013   | Yamagata-like | 2       | 09/02/2013         | NA        | NA     | Hospital  |
| Pending                        | B/Genoa/3813/2013   | Yamagata-like | 2       | 09/02/2013         | NA        | NA     | Hospital  |
| KU528952                       | B/Palermo/44/2013   | Yamagata-like | 2       | 10/02/2013         | 31 years  | Female | Hospital  |
| KU528953                       | B/Palermo/45/2013   | Yamagata-like | 2       | 11/02/2013         | 11 years  | Female | Community |
| KU528954                       | B/Palermo/46/2013   | Yamagata-like | 2       | 11/02/2013         | 9 years   | Male   | Community |
| KU528955                       | B/Palermo/47/2013   | Yamagata-like | 2       | 11/02/2013         | 12 years  | Female | Community |
| KU528956                       | B/Palermo/48/2013   | Yamagata-like | 2       | 12/02/2013         | 5 years   | Male   | Community |
| KU528957                       | B/Palermo/49/2013   | Yamagata-like | 2       | 12/02/2013         | 9 years   | Male   | Community |
| KU528958                       | B/Palermo/50/2013   | Yamagata-like | 2       | 12/02/2013         | 9 years   | Male   | Community |
| KU528959                       | B/Palermo/51/2013   | Yamagata-like | 2       | 12/02/2013         | 4 years   | Male   | Community |
| KU528960                       | B/Palermo/52/2013   | Yamagata-like | 2       | 13/02/2013         | 63 years  | Male   | Community |
| KU528962                       | B/Palermo/54/2013   | Yamagata-like | 2       | 13/02/2013         | 6 months  | Male   | Community |
| KU528964                       | B/Palermo/56/2013   | Yamagata-like | 2       | 14/02/2013         | 12 years  | Male   | Community |
| KU528965                       | B/Palermo/57/2013   | Yamagata-like | 2       | 15/02/2013         | 6 years   | Male   | Hospital  |
| KU528966                       | B/Palermo/58/2013   | Yamagata-like | 2       | 15/02/2013         | 8 years   | Female | Community |
| KU528967                       | B/Palermo/59/2013   | Yamagata-like | 2       | 15/02/2013         | 10 years  | Male   | Hospital  |
| Pending                        | B/Genoa/3913/2013   | Yamagata-like | 2       | 17/02/2013         | NA        | NA     | Hospital  |
| KU528968                       | B/Palermo/61/2013   | Yamagata-like | 2       | 18/02/2013         | 2 years   | Male   | Community |
| KU528969                       | B/Palermo/62/2013   | Yamagata-like | 2       | 18/02/2013         | 74 years  | Female | Community |
| KU528970                       | B/Palermo/63/2013   | Yamagata-like | 2       | 18/02/2013         | 1 years   | Female | Community |
| KU528971                       | B/Palermo/64/2013   | Yamagata-like | 2       | 18/02/2013         | 66 years  | Female | Community |
| KU528972                       | B/Palermo/67/2013   | Yamagata-like | 2       | 18/02/2013         | 10 months | Female | Community |
| KU528973                       | B/Palermo/68/2013   | Yamagata-like | 2       | 18/02/2013         | 3 years   | Male   | Community |
| KU528974                       | B/Palermo/70/2013   | Yamagata-like | 2       | 19/02/2013         | 2 years   | Female | Community |
| KU528975                       | B/Palermo/71/2013   | Yamagata-like | 2       | 19/02/2013         | 57 years  | Female | Community |
| KU528976                       | B/Palermo/72/2013   | Yamagata-like | 2       | 19/02/2013         | 6 years   | Male   | Community |
| KU528977                       | B/Palermo/73/2013   | Yamagata-like | 2       | 19/02/2013         | 6 years   | Male   | Community |
| KU528978                       | B/Palermo/74/2013   | Yamagata-like | 2       | 19/02/2013         | 9 years   | Male   | Community |
| KU528980                       | B/Palermo/76/2013   | Yamagata-like | 2       | 20/02/2013         | 35 years  | Female | Community |
| KU528981                       | B/Palermo/77/2013   | Yamagata-like | 2       | 20/02/2013         | 32 years  | Male   | Community |
| KU528982                       | B/Palermo/78/2013   | Yamagata-like | 2       | 21/02/2013         | 6 years   | Male   | Community |
| KU528983                       | B/Palermo/79/2013   | Yamagata-like | 2       | 21/02/2013         | 3 years   | Female | Community |
| KU528984                       | B/Palermo/80/2013   | Yamagata-like | 2       | 21/02/2013         | 35 years  | Female | Community |
| KU528985                       | B/Palermo/81/2013   | Yamagata-like | 2       | 22/02/2013         | 5 years   | Male   | Community |
| KU528986                       | B/Palermo/82/2013   | Yamagata-like | 2       | 22/02/2013         | 58 years  | Male   | Community |
| KU528987                       | B/Palermo/83/2013   | Yamagata-like | 2       | 22/02/2013         | 2 years   | Female | Community |
| KU528988                       | B/Palermo/84/2013   | Yamagata-like | 2       | 22/02/2013         | 3 years   | Female | Community |
| KU528990                       | B/Palermo/86-A/2013 | Yamagata-like | 2       | 23/02/2013         | 53 years  | Female | Hospital  |
| KU528993                       | B/Palermo/88/2013   | Yamagata-like | 2       | 25/02/2013         | 76 years  | Female | Community |

Table S1. Cont.

| GENBANK<br>ACCESSION<br>NUMBER | VIRUS NAME          | B LINEAGE     | B CLADE | COLLECTION<br>DATE | AGE      | SEX    | SOURCE    |
|--------------------------------|---------------------|---------------|---------|--------------------|----------|--------|-----------|
| KU528994                       | B/Palermo/89/2013   | Yamagata-like | 2       | 25/02/2013         | 7 years  | Male   | Community |
| KU528995                       | B/Palermo/90/2013   | Yamagata-like | 2       | 25/02/2013         | 44 years | Female | Community |
| KU528996                       | B/Palermo/91/2013   | Yamagata-like | 2       | 25/02/2013         | 86 years | Male   | Community |
| KU528997                       | B/Palermo/92/2013   | Yamagata-like | 2       | 25/02/2013         | 49 years | Female | Hospital  |
| KU528998                       | B/Palermo/93/2013   | Yamagata-like | 2       | 25/02/2013         | 9 years  | Male   | Community |
| Pending                        | B/Genoa/4013/2013   | Yamagata-like | 2       | 25/02/2013         | NA       | NA     | Hospital  |
| KU528999                       | B/Palermo/95/2013   | Yamagata-like | 2       | 27/02/2013         | 13 years | Male   | Community |
| KU529000                       | B/Palermo/96/2013   | Yamagata-like | 2       | 27/02/2013         | 77 years | Male   | Hospital  |
| KU529001                       | B/Palermo/97/2013   | Yamagata-like | 2       | 28/02/2013         | 5 years  | Male   | Community |
| KU529004                       | B/Palermo/100/2013  | Yamagata-like | 2       | 04/03/2013         | 5 years  | Female | Community |
| KF700629                       | B/Palermo/101/2013  | Yamagata-like | 2       | 04/03/2013         | 18 years | Male   | Community |
| KU529006                       | B/Palermo/102/2013  | Yamagata-like | 2       | 04/03/2013         | 10 years | Female | Community |
| KU529003                       | B/Palermo/99/2013   | Yamagata-like | 2       | 04/03/2013         | 6 years  | Female | Community |
| KU529007                       | B/Palermo/103/2013  | Yamagata-like | 2       | 05/03/2013         | 44 years | Male   | Hospital  |
| KU529008                       | B/Palermo/104/2013  | Yamagata-like | 2       | 05/03/2013         | 54 years | Female | Hospital  |
| KU529009                       | B/Palermo/105/2013  | Yamagata-like | 2       | 05/03/2013         | 1 years  | Female | Community |
| KU529011                       | B/Palermo/107/2013  | Yamagata-like | 2       | 06/03/2013         | 6 years  | Male   | Community |
| KU529012                       | B/Palermo/108/2013  | Yamagata-like | 2       | 12/03/2013         | 6 years  | Female | Community |
| KU529013                       | B/Palermo/109/2013  | Yamagata-like | 2       | 12/03/2013         | 4 years  | Female | Community |
| KU529014                       | B/Palermo/110/2013  | Yamagata-like | 2       | 12/03/2013         | 29 years | Female | Community |
| KU529015                       | B/Palermo/111/2013  | Yamagata-like | 2       | 18/03/2013         | 3years   | Female | Community |
| KU528991                       | B/Palermo/86-B/2013 | Yamagata-like | 2       | 20/03/2013         | 41 years | Male   | Community |
| KU529016                       | B/Palermo/112/2013  | Yamagata-like | 2       | 27/03/2013         | 45 years | Female | Hospital  |
| Pending                        | B/Genoa/0112/1213   | Yamagata-like | 3       | 28/12/2012         | 50years  | Male   | Hospital  |
| KU528917                       | B/Palermo/2/2013    | Yamagata-like | 3       | 16/01/2013         | 4years   | Female | Community |
| Pending                        | B/Genoa/2913/2013   | Yamagata-like | 3       | 24/01/2013         | NA       | NA     | Hospital  |
| Pending                        | B/Genoa/0613/1213   | Yamagata-like | 3       | 25/01/2013         | 47 years | Male   | Hospital  |
| Pending                        | B/Genoa/3013/2013   | Yamagata-like | 3       | 25/01/2013         | NA       | NA     | Hospital  |
| KU528963                       | B/Palermo/55/2013   | Yamagata-like | 3       | 13/02/2013         | 4 years  | Male   | Community |
| KU528989                       | B/Palermo/85/2013   | Yamagata-like | 3       | 22/02/2013         | 4 years  | Male   | Community |
| KU529010                       | B/Palermo/106/2013  | Yamagata-like | 3       | 06/03/2013         | 42 years | Female | Community |
| KU529019                       | B/Palermo/4/2015    | Yamagata-like | 3       | 26/01/2015         | 8 years  | Female | Community |
| KU529020                       | B/Palermo/5/2015    | Yamagata-like | 3       | 27/01/2015         | 12 years | Female | Community |
| KU529021                       | B/Palermo/7/2015    | Yamagata-like | 3       | 05/02/2015         | 55 years | Male   | Community |
| KU529022                       | B/Palermo/8/2015    | Yamagata-like | 3       | 10/02/2015         | 10 years | Male   | Community |
| KU529023                       | B/Palermo/9/2015    | Yamagata-like | 3       | 13/02/2015         | 49 years | Male   | Community |
| KU529024                       | B/Palermo/10/2015   | Yamagata-like | 3       | 13/02/2015         | 7 years  | Male   | Community |
| Pending                        | B/Genoa/09/2015     | Yamagata-like | 3       | 16/02/2015         | 66 years | Male   | Hospital  |
| KU529025                       | B/Palermo/11/2015   | Yamagata-like | 3       | 16/02/2015         | 37 years | Female | Community |
| KU529026                       | B/Palermo/12/2015   | Yamagata-like | 3       | 16/02/2015         | 39 years | Male   | Community |
| KU529027                       | B/Palermo/13/2015   | Yamagata-like | 3       | 17/02/2015         | 8 years  | Male   | Community |
| Pending                        | B/Genoa/10/2015     | Yamagata-like | 3       | 20/02/2015         | 43 years | Male   | Hospital  |
| KU529028                       | B/Palermo/14/2015   | Yamagata-like | 3       | 23/02/2015         | 15 years | Male   | Community |
| KU529029                       | B/Palermo/15/2015   | Yamagata-like | 3       | 24/02/2015         | 50 years | Male   | Community |
| KU529030                       | B/Palermo/16/2015   | Yamagata-like | 3       | 25/02/2015         | 5 years  | Female | Community |
| KU529031                       | B/Palermo/17/2015   | Yamagata-like | 3       | 26/02/2015         | 11 years | Female | Community |
| Pending                        | B/Genoa/11/2015     | Yamagata-like | 3       | 02/03/2015         | 41 years | Male   | Hospital  |
| KU529032                       | B/Palermo/18/2015   | Yamagata-like | 3       | 02/03/2015         | 11 years | Male   | Community |
| Pending                        | B/Genoa/12/2015     | Yamagata-like | 3       | 03/03/2015         | 57 years | Female | Hospital  |
| KU529033                       | B/Palermo/19/2015   | Yamagata-like | 3       | 03/03/2015         | 15 years | Female | Hospital  |
| Pending                        | B/Genoa/14/2015     | Yamagata-like | 3       | 04/03/2015         | 90 years | Female | Hospital  |
| KU529036                       | B/Palermo/23/2015   | Yamagata-like | 3       | 10/03/2015         | 4 years  | Male   | Community |
| Pending                        | B/Genoa/15/2015     | Yamagata-like | 3       | 11/03/2015         | 69 years | Male   | Hospital  |
| KU529038                       | B/Palermo/25/2015   | Yamagata-like | 3       | 12/03/2015         | 17 years | Male   | Community |
| KU529039                       | B/Palermo/26/2015   | Yamagata-like | 3       | 12/03/2015         | 40 years | Male   | Community |
| KU529040                       | B/Palermo/27/2015   | Yamagata-like | 3       | 12/03/2015         | 7 years  | Male   | Community |
| KU529041                       | B/Palermo/28/2015   | Yamagata-like | 3       | 12/03/2015         | 40 years | Female | Community |
| Pending                        | B/Genoa/16/2015     | Yamagata-like | 3       | 16/03/2015         | 90 years | Female | Hospital  |
| KU529042                       | B/Palermo/29/2015   | Yamagata-like | 3       | 16/03/2015         | 46 years | Male   | Community |
| KU529043                       | B/Palermo/30/2015   | Yamagata-like | 3       | 16/03/2015         | 2 years  | Male   | Hospital  |
| KU529045                       | B/Palermo/32/2015   | Yamagata-like | 3       | 18/03/2015         | 32 years | Male   | Community |
| KU529046                       | B/Palermo/33/2015   | Yamagata-like | 3       | 20/03/2015         | 37 years | Female | Community |
| KU529051                       | B/Palermo/38/2015   | Yamagata-like | 3       | 30/03/2015         | 8 years  | Male   | Community |
| KU529052                       | B/Palermo/39/2015   | Yamagata-like | 3       | 30/03/2015         | 67 years | Male   | Community |
| KU529055                       | B/Palermo/42/2015   | Yamagata-like | 3       | 30/03/2015         | 2 years  | Female | Community |
| KU529056                       | B/Palermo/43/2015   | Yamagata-like | 3       | 30/03/2015         | 6 years  | Male   | Community |
| KU529057                       | B/Palermo/45/2015   | Yamagata-like | 3       | 01/04/2015         | 7 years  | Male   | Community |
| KU529058                       | B/Palermo/47/2015   | Yamagata-like | 3       | 01/04/2015         | 11 years | Male   | Community |

Table S1. Cont.

| GENBANK<br>ACCESSION<br>NUMBER | VIRUS NAME        | B LINEAGE     | B CLADE        | COLLECTION<br>DATE | AGE      | SEX    | SOURCE    |
|--------------------------------|-------------------|---------------|----------------|--------------------|----------|--------|-----------|
| KU529059                       | B/Palermo/48/2015 | Yamagata-like | 3              | 03/04/2015         | 9 years  | Male   | Community |
| KU529060                       | B/Palermo/49/2015 | Yamagata-like | 3              | 03/04/2015         | 55 years | Male   | Community |
| KU529061                       | B/Palermo/50/2015 | Yamagata-like | 3              | 04/04/2015         | 31 years | Female | Community |
| KU529062                       | B/Palermo/51/2015 | Yamagata-like | 3              | 05/04/2015         | 37 years | Male   | Hospital  |
| Pending                        | B/Genoa/17/2015   | Yamagata-like | 3              | 29/04/2015         | 87 years | Female | Hospital  |
| KU529064                       | B/Palermo/53/2015 | Yamagata-like | 3              | 19/05/2015         | 80 years | Male   | Hospital  |
| Pending                        | B/Genoa/18/2015   | Yamagata-like | 3              | 22/05/2015         | 90 years | Female | Hospital  |
| KU529017                       | B/Palermo/1/2015  | Yamagata-like | 3A             | 19/01/2015         | 68 years | Female | Community |
| KU529018                       | B/Palermo/2/2015  | Yamagata-like | 3A             | 21/01/2015         | 30 years | Female | Community |
| KU529034                       | B/Palermo/21/2015 | Yamagata-like | 3A             | 10/03/2015         | 12 years | Female | Community |
| KU529049                       | B/Palermo/36/2015 | Yamagata-like | 3A             | 25/03/2015         | 6 years  | Male   | Community |
| KU528913                       | B/Palermo/2/2011  | Yamagata-like | Non determined | 14/01/2011         | 51 years | Male   | Hospital  |
| Pending                        | B/Genoa/01/2014   | Yamagata-like | Non determined | 25/02/2014         | 48 years | Male   | Hospital  |

NA: not available.

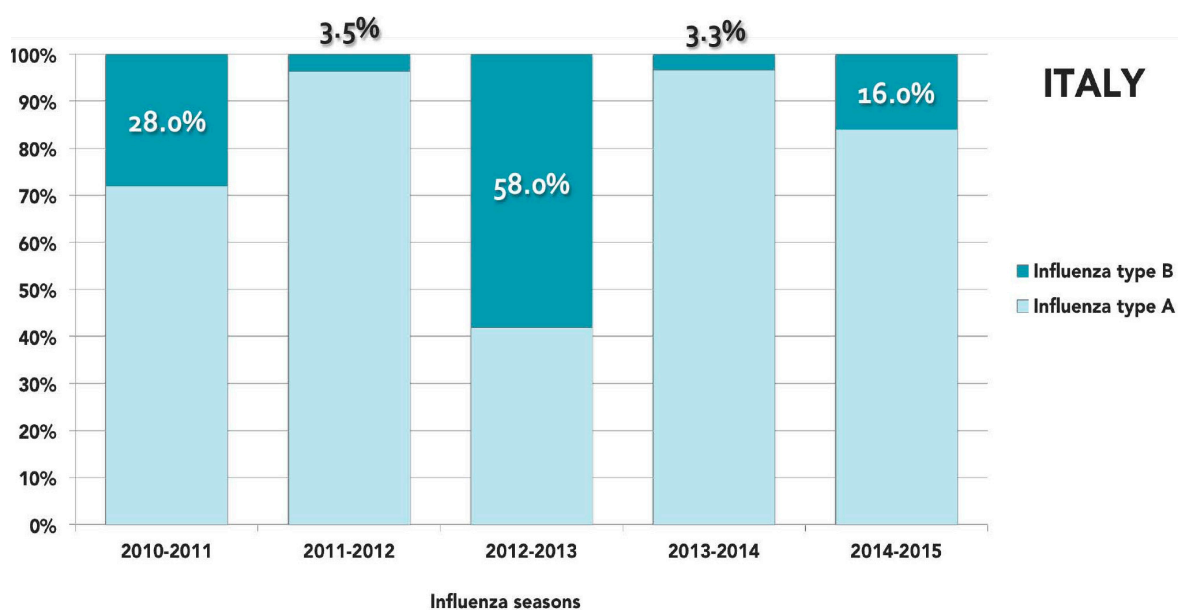

Figure S1. Relative proportions of influenza virus types detected in Italy, according to seasonal epidemics. Percentages reported in the figure refer to influenza B. Source: virological data from Italian Surveillance Network (INFLUNET).

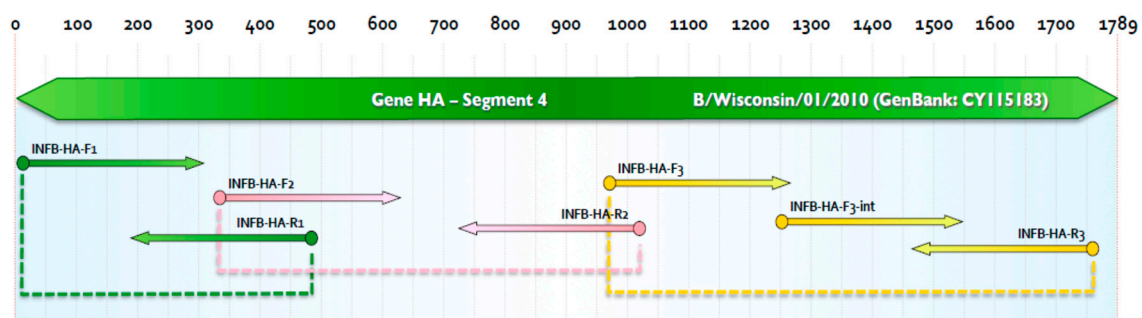

| Fragment | Primer         | Sequence                                 |
|----------|----------------|------------------------------------------|
| 1b       | INFB-HA-F1     | 5' - ATG AAG GCA ATA ATT GTA CTA CTC -3' |
| 1b       | INFB-HA-R1     | 5' - GGCAAG AYC CTG AGG TTCC -3'         |
| 2b       | INFB-HA-F2     | 5' - CTT TCC TAT AAT GCA CGA CAG AAC -3' |
| 2b       | INFB-HA-R2     | 5' - CAT ATT GGG CAA TTT CCT ATG GC -3'  |
| 3b       | INFB-HA-F3     | 5' - AGC AAG CCT TACTAC ACA GG -3'       |
| 3b       | INFB-HA-F3-int | 5' - ATG AAC TCC ACA ACG AAA TACTCG -3'  |
| 3b       | INFB-HA-R3     | 5' - CCT TAT AGA CAG ATG GAG CAA G -3'   |

Figure S2. Schematic representation of Influenza B gene HA sequencing.
